# 1 **Spatial data analysis and geodemographics for** 2 **the prevalence of diabetes among adult** 3 **population in Bangladesh**

4 **Chowdhury Mashrur Mahdee<sup>1\*</sup>¶, Anika Tabashsum<sup>1</sup>, Most. Jannatul Ferdous Asha<sup>1</sup>, Md. Ashrafur Islam**  
5 **Khan<sup>1</sup>, Md. Aminur Rahman<sup>1¶</sup>**

6 <sup>1</sup> Department of Population Science and Human Resource Development, University of Rajshahi, Rajshahi,  
7 Bangladesh

8

9 \* Corresponding author

10 E-mail: [mashrur.mahdee10@gmail.com](mailto:mashrur.mahdee10@gmail.com)

11

12 ¶ These authors contributed equally to this work.

## 13 **Abstract**

14 Bangladesh, like most of the developing countries, is experiencing quite a substantial rise in the prevalence of  
15 noncommunicable diseases, like diabetes. For both men and women, the prevalence of diabetes has been increasing  
16 in recent decades. The objective of this study is to determine if there are statistically significant geospatial  
17 inconsistencies in the prevalence of diabetes. Cross-sectional and spatial analysis was concluded using data on  
18 12100 adults aged 18 years and above from the Bangladesh Demographic and Health Survey (BDHS) 2017-18. The  
19 prevalence of diabetes is analyzed and visualized. Spatial autocorrelation was identified using Moran's I. Hotspot  
20 analysis was also done using Moran's I. Men had a higher prevalence of diabetes (10.52%) than women do (9.50%);  
21 yet, in the sample group, more women than men have diabetes. Among diabetic men and women, 37.11% (95% CI,  
22 32.04-42.48) and 39.71% (95% CI, 35.47-44.12) respectively, are aware of their condition. Among them 33.29%  
23 men and 36.44% women are being treated for it. People living in Dhaka division (men: 15.62%, women: 13.31%)  
24 are more affected by diabetes than people living in other divisions. Increasing age, living in the highest wealth  
25 quintile, and obesity and being overweight are positively associated with the increasing prevalence of diabetes.  
26 There also exists positive spatial autocorrelation (Moran's  $I = 0.215$ ,  $p=0.001$ ). According to the Local Indicators of  
27 Spatial Association (LISA) cluster map, the hotspots are Dhaka and the central districts (10 districts), and the cold  
28 spots are the central of northside districts (7 districts). The findings draw attention to the advantages of spatial  
29 analysis in the healthcare system. And this research could help policymakers and healthcare organizations to plan  
30 and implement policies with the objective of attenuating the prevalence as well as the risk of diabetes in Bangladesh.

## 31 **Introduction**

32 A significant result of the 21st-century demographic and epidemiological shifts has been the "health transition,"  
33 defined by an unprecedented increase in the prevalence of chronic illnesses among middle-aged and older adults,  
34 such as diabetes, cancer, hypertension, and so on[1,2]. Diabetes is a chronic illness in which there is a deviation  
35 from normal glucose tolerance, typically because the body requires more insulin than the pancreas is able to produce  
36 or manage. This may occur as a result of inadequate naturally occurring insulin production or because body cells  
37 become resistant to the effects of insulin[3,4]. Previously known as "adult-onset diabetes," it was once thought to be  
38 an illness that only affected older people. But it is currently the most prevalent metabolic disease in the world and a

39 major cause of death for young and middle-aged adults[5,6]. Despite the fact that there are many biological,  
40 behavioral, and environmental risk factors, we still don't fully understand the reasons, both direct and indirect[7]. It  
41 is believed that local surroundings can either facilitate or restrict individual choices for both nutritional intake and  
42 physical activity patterns. Local environments are regarded to function as key factors of individualistic  
43 behaviors[8,9]. Such surroundings affect people's vulnerability to unfavorable health consequences as well as their  
44 capacity to effectively control it.

45 Globally, the estimated number of adults with diabetes in 2021 is 536.6 million, and by 2045, that number is  
46 estimated to increase to 783.2 million[7]. By 2045, it is predicted that low and middle-income countries (LMIC),  
47 where population growth is anticipated to be higher, would account for 94% of the growth in the number of  
48 individuals with diabetes worldwide[7]. It is estimated that 22.3 million adults in Bangladesh will suffer from  
49 diabetes by 2045, an increase from 13.1 million in 2021[7].

50 Geodemographics is the study of socioeconomic and behavioral information about individuals in relation to  
51 location (i.e., geography) and neighborhood settlements[10]. Public health research uses geodemographic data and  
52 related lifestyle segmentation methods somewhat rarely[11]. Geodemography's strength is in its ability to produce  
53 fresh perspectives on spatial effects that may be researched and discussed in more depth[12]. So, it is an exploratory  
54 method. The application of geodemographics as a tool for health informatics is still intriguing, despite the  
55 reasonable criticisms of its flaws[13,14]. It is also an effective tool for evaluating health disparities at the local  
56 level[14]. The social context and the environment in which risky behavior occurs influence many of the changeable  
57 risk factors for diabetes, like sedentary behavior and food habits. Additionally, many of the risk variables that cannot  
58 be changed, such as age, income, and education, have an impact on the regions where diabetes is most  
59 prevalent[15,16].

60 The purpose of this study is to assess the prevalence of diabetes, along with awareness, treatment, and control of  
61 diabetes; as well as the factors connected with diabetes among Bangladeshi people aged 18 and above using the  
62 Bangladesh Demographic and Health Survey (BDHS) 2017–18 data.

## 63 **Methods**

### 64 **Data source**

65 This cross-sectional study examined data from the BDHS for 2017–18[17]. Major health indicators for  
66 Bangladesh, such as fasting blood glucose (FBG) biomarker measurements, were reported by BDHS 2017–18. The  
67 survey was taken between October 2017 and March 2018. The stratified sample of households used for the survey  
68 was created in two stages. A sampling frame was created using enumeration areas (EAs) taken from the 2011  
69 Bangladesh Population and Housing Census. An average of about 120 houses make up the survey's EA, or primary  
70 sampling unit (PSU). Initially, 675 EAs were selected, among which 425 and 250 were from rural and urban  
71 regions, respectively. Data were collected from 672 PSUs, and 3 PSUs were excluded due to flooding. A systematic  
72 sample of, on average, 30 households was selected from each EA in the second stage in order to produce precise  
73 estimates of the demographic and health characteristics for each of the eight divisions, for both urban as well as rural  
74 areas, and for the country as a whole. Out of the 20160 households chosen using this method, interviews were  
75 completed in 19457 households[17]. Out of these, 4864 households were chosen for the biomarker collection. In the  
76 selected 4864 households, a total of 14,704 respondents (8013 women, 6691 men), aged 18 years and older, were  
77 available for blood glucose measurement. A blood glucose test was administered to 12,100 respondents who were  
78 18 years of age and older (6919 women and 5181 men)[17] (Fig 1).

79 **Fig 1: Flowchart of study sample.**

### 80 **Outcome variables**

81 The outcome variables included awareness, treatment, and control of diabetes. At the time of the survey,  
82 individuals were deemed to have diabetes if their fasting plasma glucose (FPG) equivalent level was 7 mmol/L or  
83 higher, or if they disclosed that they were currently taking a prescribed medicine to treat their high blood sugar[17].  
84 Prior to the test, respondents were instructed to fast for at least eight hours and only consume plain water. Using the  
85 HemoCue Glucose 201 DM system, which has plasma conversion, a capillary blood sample from willing and  
86 qualified respondents was tested[17]. The measures of fasting whole blood glucose recorded throughout the survey

87 were automatically translated to corresponding fasting plasma glucose values. Respondents are considered to be  
88 aware of their condition if they have previously known their glucose level and/or have been told they have diabetes  
89 by a physician or nurse. Those who were receiving medication at the time of the survey are regarded as being under  
90 treatment for diabetes. Participants who had their FPG reading at or below 7.0 mmol/L at the time of the survey  
91 were considered to be in control of their diabetes[17].

## 92 **Explanatory variables**

93 Following explanatory variables were incorporated into the study: age (18-34, 35-39, 40-44, 45-49, 50-54, 55-59,  
94 60-64 and 65 and above), sex (men, women), place of residence (urban, rural), division of residence (Barisal,  
95 Chittagong, Dhaka, Khulna, Mymensingh, Rajshahi, Rangpur and Sylhet), level of education (no education,  
96 primary, secondary, college or higher), wealth quintile (poorest, poorer, middle, richer, richest), nutritional status or  
97 BMI (underweight, normal, overweight, obese), hypertension (yes, no), marital status (never married, married,  
98 widowed, divorced), current employment status (yes, no)[17]. Principal component analysis was used to determine  
99 the wealth quintile based on the participants' durable and nondurable household items. BMI was classified using the  
100 WHO-recommended Asian cut-off[18]. Indicators of hypertension were a systolic blood pressure of  $\geq 140$  mmHg  
101 and/or a diastolic blood pressure of  $\geq 90$  mmHg and/or currently using medication to treat hypertension [17].

## 102 **Statistical analysis**

103 For the entire study population as well as population subgroups, the crude diabetes prevalence was estimated.  
104 Prevalence was estimated taking into consideration the weighted sample and complex survey design. Crude  
105 prevalence estimates of diabetes awareness, treatment, and control were derived. The data were presented with a  
106 95% confidence interval (CI), and statistical significance was established by using a p-value of  $< 0.05$ . The statistical  
107 software program Stata (version 13.1; Stata Corp LP, College Station, Texas) was used for all analyses.

## 108 **Spatial analysis**

109 This research employs a number of techniques to deconstruct the spatial distribution of diabetes prevalence in  
110 Bangladesh. To measure the spatial proximity between each potential pair of locations, a spatial weight matrix was

111 generated. Various methods, including the Queen's, Rook's, and Bishop's methods, can be used to calculate the  
112 matrix depending on how the neighbors are defined[19]. This study uses Queen's approach to construct a 1<sup>st</sup> order  
113 spatial weight matrix. Additionally, a spatial weight matrix was generated using the inverse distance weighting  
114 method. When working with standard square grids, this approach is more advantageous. The prevalence and  
115 clustering of diabetes in Bangladesh are examined using Moran's I, a global indicator of spatial autocorrelation[20].  
116 The values of Moran's I range from 1 to -1. When similar values cluster together, the value "1" denotes perfect  
117 positive spatial autocorrelation. The close spatial distribution of regions with identical attribute values would be  
118 indicated by a positive spatial autocorrelation. And "-1" denotes perfect negative spatial autocorrelation. Negative  
119 spatial autocorrelation would suggest differences in locations that are closely related to one another. The 999  
120 iterations of the Monte Carlo simulation were chosen as the threshold for testing significance. It was determined  
121 how similar or different the data points were from their neighbors using the local Moran's I, which also measures  
122 spatial autocorrelation[21]. Neighborhood values that are near a specific spatial location are correlated, and this is  
123 measured by Local Indicators of Spatial Association (LISA). It represents how randomly and spatially clustered the  
124 data are. Furthermore, using five fundamental classifications, the local Moran's I is utilized to determine the spatial  
125 distribution of diabetes clusters and outliers in Bangladesh:

- 126 1. High-High (hot spots): A district is classified as High-High if it has a high prevalence of diabetes and is  
127 surrounded by other districts that also have high prevalence rates.
- 128 2. High-Low: A district is classified as High-Low if it has a high prevalence of diabetes and is surrounded by  
129 other districts that have low prevalence rates.
- 130 3. Low-High: A district is classified as Low-High if it has a low prevalence of diabetes and is surrounded by  
131 other districts that have high prevalence rates.
- 132 4. Low-Low (cold spots): A district is classified as Low-low if it has a low prevalence of diabetes and is  
133 surrounded by other districts that also have low prevalence rates.
- 134 5. Not Significant: Districts with statistically insignificant spatial patterns.

135 For clusters found by the local Moran's I, the significance level can also be altered. For instance, analysts can be  
136 more selective by choosing  $p < 0.01$  or  $p < 0.001$  as the significant level instead of  $p < 0.05$ . If regions (districts) be  
137 discovered to be statistically significant within the boundaries of these more strict p-values, there's a possibility that  
138 the outliers and/or clusters will be of higher quality[22]. R (version 4.2.1) was used to conduct all of the analyses.

## 139 Results

140 Table-1 provides information about the houses and localities of the study population's participants, as well as  
 141 their sociodemographic and health characteristics. Out of the 12100 individuals that were analyzed, 1202 of them  
 142 had diabetes. The participants' average (SE) fasting plasma glucose values were 56.74 (0.15) mmol/dL, their  
 143 average (SE) age was 39.85 (0.15) years, and their average (SE) BMI was 22.39 (0.04) kg/m<sup>2</sup>. 26.5% of participants  
 144 lived in urban regions; 57.2% of participants were female; 26.6% had no formal education; and 39.6% were  
 145 overweight or obese.

146 **Table 1: Distribution of the study sample according to presence of diabetes.**

| Variables                                           | Total<br>(n=12100) | Diabetes     |              | p-value |
|-----------------------------------------------------|--------------------|--------------|--------------|---------|
|                                                     |                    | Yes (n=1202) | No (n=10898) |         |
| <b>Mean (SE) of fasting plasma glucose, mmol/dL</b> | 56.74 (0.15)       |              |              |         |
| <b>Age (in years)</b>                               |                    |              |              |         |
| Mean (SE)                                           | 39.85 (0.15)       |              |              | <0.001  |
| 18 to 34                                            | 5415               | 284          | 5130         |         |
| 35 to 39                                            | 1384               | 141          | 1243         |         |
| 40 to 44                                            | 1044               | 130          | 914          |         |
| 45 to 49                                            | 1008               | 133          | 875          |         |
| 50 to 54                                            | 677                | 116          | 561          |         |
| 55 to 59                                            | 685                | 104          | 581          |         |
| 60 to 64                                            | 679                | 112          | 568          |         |
| 65 or more                                          | 1208               | 182          | 1026         |         |
| <b>Sex</b>                                          |                    |              |              |         |
| Female                                              | 6919               | 657          | 6261         | 0.0715  |
| Male                                                | 5181               | 545          | 4636         |         |
| <b>Nutritional status (BMI)</b>                     |                    |              |              |         |
| Mean (SE)                                           | 22.39 (0.04)       |              |              | <0.001  |
| Underweight                                         | 2068               | 128          | 1940         |         |
| Normal                                              | 5098               | 402          | 4696         |         |
| Overweight                                          | 1917               | 204          | 1713         |         |
| Obese                                               | 2879               | 448          | 2431         |         |
| <b>Hypertension</b>                                 |                    |              |              |         |
| No                                                  | 8755               | 648          | 8107         | <0.001  |
| Yes                                                 | 3346               | 555          | 2791         |         |
| <b>Currently working status</b>                     |                    |              |              |         |
| No                                                  | 4738               | 561          | 4177         | <0.001  |
| Yes                                                 | 7362               | 641          | 6721         |         |
| <b>Education level</b>                              |                    |              |              |         |
| No formal education                                 | 3218               | 314          | 2903         | 0.8991  |
| Primary                                             | 3614               | 363          | 3250         |         |
| Secondary                                           | 3569               | 364          | 3205         |         |
| College or above                                    | 1701               | 161          | 1539         |         |
| <b>Wealth quintile</b>                              |                    |              |              |         |

|                              |      |     |      |        |
|------------------------------|------|-----|------|--------|
| Poorest                      | 2338 | 134 | 2204 | <0.001 |
| Poorer                       | 2391 | 142 | 2248 |        |
| Middle                       | 2496 | 198 | 2297 |        |
| Richer                       | 2410 | 276 | 2134 |        |
| Richest                      | 2466 | 452 | 2014 |        |
| <b>Place of residence</b>    |      |     |      |        |
| Urban                        | 3211 | 426 | 2785 | <0.001 |
| Rural                        | 8889 | 777 | 8113 |        |
| <b>Division of residence</b> |      |     |      |        |
| Dhaka                        | 2792 | 400 | 2392 | <0.001 |
| Barisal                      | 668  | 64  | 603  |        |
| Chattogram                   | 2084 | 233 | 1850 |        |
| Khulna                       | 1512 | 125 | 1387 |        |
| Mymensingh                   | 989  | 78  | 911  |        |
| Rajshahi                     | 1751 | 141 | 1610 |        |
| Rangpur                      | 1516 | 85  | 1431 |        |
| Sylhet                       | 789  | 77  | 712  |        |

147 Table 2 and 3 give a summary of the prevalence of diabetes and its awareness, treatment, and control by sex of  
148 respondents. Diabetes is more prevalent in men (10.52, 95% CI: 9.59-11.54) compared to women (9.50, 95% CI:  
149 8.66-10.42). Older individuals exhibited a higher crude prevalence rate than younger individuals among both women  
150 and men. The lowest prevalence of diabetes is found in adults 18 to 34 years old, regardless of sex. For both men  
151 (12.95, 95% CI: 11.29-14.80) and women (13.52, 95% CI: 11.69-15.58), living in an urban area is associated with a  
152 greater prevalence of diabetes than living in a rural one. The prevalence of diabetes was the maximum among those  
153 with obesity (men: 18.00, 95% CI: 15.42-20.89; women: 14.48, 95% CI: 12.78-16.35); hypertension (men: 16.97,  
154 95% CI: 14.87-19.30; women: 16.31, 95% CI: 14.43-18.38); and in the highest quintile of wealth (men: 21.08, 95%  
155 CI: 18.57-23.84; women: 16.28, 95% CI: 14.15-18.65). Diabetes awareness increased for both sexes with each  
156 wealth quintile. High awareness and treatment rates are also present in hypertensive men and women. Overweight  
157 and obese individuals of both sexes had a greater prevalence of diabetes awareness and treatment. Diabetes  
158 awareness (61.22, 95% CI: 45.78-47.70) and treatment (54.62, 95% CI: 39.21-69.19) were highest among women  
159 aged 50-54 years. Men aged 55-59 years had the highest prevalence of diabetes awareness (63.17, 95% CI: 43.72-  
160 79.12) and treatment (62.12, 95% CI: 42.82-78.20). Women 65 years and older and men aged 45-49 years have the  
161 highest diabetes control rates: 44.38 (95% CI: 27.96-62.13) and 43.49 (95% CI: 20.13-70.16) respectively.  
162 Furthermore, diabetes treatment and control is higher for both sexes in rural regions than in urban ones.

163 **Table-2: Crude prevalence of diabetes and its awareness, treatment and control status of both sex for**  
164 **different age groups.**



| Characteristics | Prevalence of diabetes (95% Confidence Interval) |                     |                     |                     |                     |                     |                     |                     |
|-----------------|--------------------------------------------------|---------------------|---------------------|---------------------|---------------------|---------------------|---------------------|---------------------|
|                 | Women                                            |                     |                     |                     | Men                 |                     |                     |                     |
|                 | Diabetes (%)                                     | Aware (%)           | Treated (%)         | Controlled (%)      | Diabetes (%)        | Aware (%)           | Treated (%)         | Controlled (%)      |
| <b>Total</b>    | 9.50(8.66-10.42)                                 | 39.71(35.47-44.12)  | 36.44(32.37-40.71)  | 29.70(24.11-35.97)  | 10.52(9.59-11.54)   | 37.11(32.04-42.48)  | 33.29(28.54-38.40)  | 32.40(25.69-40.08)  |
| <b>Age</b>      |                                                  |                     |                     |                     |                     |                     |                     |                     |
| 18-34           | 5.26 (4.43-6.24)                                 | 19.28 (13.99-25.99) | 16.35 (11.47-22.78) | 25.06 (12.33-44.30) | 5.23 (4.21-6.48)    | 6.23 (2.87-13.00)   | 5.90 (2.62-12.74)   | 9.84 (1.25-48.53)   |
| 35-39           | 11.50 (9.00-14.58)                               | 33.23 (22.96-45.38) | 32.11 (21.97-44.28) | 21.59 (9.37-42.33)  | 8.74 (6.66-11.39)   | 27.54 (16.81-41.69) | 25.45 (15.08-39.62) | 20.22 (6.92-46.37)  |
| 40-44           | 11.89 (9.28-15.10)                               | 44.11 (32.06-56.89) | 38.30 (27.05-50.96) | 26.73 (13.64-45.73) | 13.13 (9.86-17.26)  | 21.20 (11.65-35.43) | 19.49 (10.30-33.78) | 29.77 (8.44-66.10)  |
| 45-49           | 14.74 (11.74-18.36)                              | 52.78 (40.01-65.20) | 50.75 (38.49-62.91) | 34.55 (21.18-50.91) | 11.22 (8.29-15.02)  | 45.96 (30.50-62.24) | 36.73 (22.83-53.26) | 43.49 (20.13-70.16) |
| 50-54           | 16.67 (12.60-21.72)                              | 61.22 (45.78-74.70) | 54.62 (39.21-69.19) | 21.15 (9.41-40.93)  | 17.66 (13.54-22.70) | 33.80 (21.91-48.16) | 31.40 (19.96-45.66) | 37.96 (18.16-62.78) |
| 55-59           | 16.44 (12.85-20.80)                              | 50.03 (37.42-62.64) | 44.36 (31.88-57.61) | 27.99 (14.25-47.62) | 13.62 (9.52-19.11)  | 63.17 (43.72-79.12) | 62.12 (42.84-78.20) | 24.75 (10.93-46.86) |
| 60-64           | 15.03 (11.30-19.72)                              | 52.14 (36.54-67.32) | 49.11 (33.80-64.59) | 31.21 (14.99-53.86) | 17.71 (13.71-22.59) | 58.99 (44.63-71.96) | 54.15 (40.02-67.64) | 33.34 (18.32-52.74) |
| 65 and above    | 13.55 (10.67-17.06)                              | 46.32 (33.91-59.20) | 44.88 (32.62-57.78) | 44.38 (27.96-62.13) | 16.31 (13.45-19.64) | 55.27 (44.06-65.96) | 47.15 (36.37-58.20) | 36.70 (23.66-52.03) |

165 **Table-3: Crude prevalence of diabetes and its awareness, treatment and control status of both sex by**  
 166 **different factors.**

| Characteristics  | Prevalence of diabetes (95% Confidence Interval) |                     |                     |                     |                     |                     |                     |                     |
|------------------|--------------------------------------------------|---------------------|---------------------|---------------------|---------------------|---------------------|---------------------|---------------------|
|                  | Women                                            |                     |                     |                     | Men                 |                     |                     |                     |
|                  | Diabetes (%)                                     | Aware (%)           | Treated (%)         | Controlled (%)      | Diabetes (%)        | Aware (%)           | Treated (%)         | Controlled (%)      |
| <b>Residence</b> |                                                  |                     |                     |                     |                     |                     |                     |                     |
| Urban            | 13.52 (11.69-15.58)                              | 39.90 (33.94-46.19) | 36.29 (30.69-42.29) | 26.80 (19.03-36.31) | 12.95 (11.29-14.80) | 33.14 (26.13-40.98) | 30.86 (24.34-38.25) | 28.59 (17.64-42.81) |
| Rural            | 9.50 (8.66-10.42)                                | 39.60 (33.99-45.50) | 36.53 (31.10-42.32) | 31.37 (24.00-39.98) | 9.61 (8.49-10.84)   | 39.14 (32.44-46.27) | 33.29 (28.54-38.40) | 34.25 (25.94-43.65) |
| <b>Division</b>  |                                                  |                     |                     |                     |                     |                     |                     |                     |
| Barisal          | 9.49 (7.14-12.52)                                | 34.42 (23.91-46.73) | 32.39 (22.49-44.17) | 44.08 (27.32-62.31) | 9.85 (7.23-13.28)   | 43.96 (28.27-60.95) | 40.47 (25.62-57.31) | 40.65 (19.49-65.95) |
| Chittagong       | 10.63 (8.60-13.06)                               | 49.03 (38.62-59.52) | 43.34 (33.52-53.70) | 28.03 (16.85-42.81) | 12.08 (9.50-15.23)  | 46.84 (34.47-59.62) | 43.91 (32.30-56.23) | 32.57 (18.39-50.86) |
| Dhaka            | 13.31 (10.82-16.27)                              | 27.56 (20.28-36.26) | 25.34 (18.34-33.90) | 21.11 (10.35-38.28) | 15.62 (13.18-18.42) | 26.95 (17.87-38.48) | 22.79 (14.45-34.03) | 30.59 (16.29-49.95) |
| Khulna           | 7.82 (6.27-9.72)                                 | 51.54 (41.45-61.51) | 49.03 (39.70-58.42) | 33.84 (20.41-50.50) | 8.85 (6.92-11.26)   | 33.26 (22.90-45.52) | 31.13 (21.06-43.37) | 23.92 (10.05-46.93) |
| Mymensingh       | 8.54 (6.65-                                      | 34.34 (22.29-       | 32.40 (20.70-       | 36.93 (16.83-62.87) | 6.95 (5.12-9.37)    | 35.28 (20.87-       | 32.02 (18.44-       | 65.08 (37.37-85.34) |

|                                 |                        |                        |                        |                        |                        |                        |                        |                     |
|---------------------------------|------------------------|------------------------|------------------------|------------------------|------------------------|------------------------|------------------------|---------------------|
|                                 | 10.90)                 | 48.81)                 | 46.82)                 |                        |                        | 52.97)                 | 49.54)                 |                     |
| Rajshahi                        | 7.52<br>(5.88-9.57)    | 48.88<br>(36.49-61.40) | 42.50<br>(30.78-55.13) | 30.12<br>(16.15-49.10) | 8.74 (6.49-11.68)      | 46.19<br>(31.02-62.10) | 37.90<br>(24.79-53.06) | 22.27 (9.87-42.85)  |
| Rangpur                         | 5.01<br>(3.67-6.79)    | 49.51<br>(34.70-64.41) | 46.86<br>(32.60-61.65) | 18.25<br>(6.71-40.91)  | 6.30 (4.62-8.54)       | 53.25<br>(36.36-69.44) | 52.19<br>(35.32-68.58) | 39.15 (22.18-59.22) |
| Sylhet                          | 10.22<br>(7.71-13.42)  | 36.65<br>(24.95-50.17) | 36.65<br>(24.95-50.17) | 50.36<br>(35.86-64.80) | 9.08 (6.58-12.39)      | 30.07<br>(20.14-42.30) | 27.18<br>(17.92-38.94) | 25.62 (9.26-53.77)  |
| <b>Education</b>                |                        |                        |                        |                        |                        |                        |                        |                     |
| No education                    | 10.28<br>(8.85-11.91)  | 44.41<br>(36.52-52.60) | 41.38<br>(33.68-49.54) | 35.09<br>(24.92-46.83) | 8.92 (7.14-11.09)      | 28.59<br>(19.26-40.19) | 26.84<br>(17.80-38.33) | 43.18 (24.85-63.58) |
| Primary                         | 10.22<br>(8.63-12.07)  | 34.34<br>(27.48-41.93) | 31.12<br>(24.73-38.33) | 28.32<br>(18.84-40.21) | 9.84 (8.30-11.63)      | 27.62<br>(20.43-36.20) | 22.62<br>(16.12-30.77) | 42.01 (25.44-60.60) |
| Secondary                       | 8.96<br>(7.58-10.56)   | 42.10<br>(34.85-49.72) | 38.40<br>(31.32-46.01) | 19.51<br>(11.55-31.04) | 12.03<br>(10.17-14.17) | 43.69<br>(34.21-53.65) | 39.35<br>(30.32-49.18) | 21.45 (12.84-33.60) |
| College or higher               | 7.12<br>(5.51-9.16)    | 34.13<br>(23.24-47.01) | 31.26<br>(20.70-44.19) | 51.61<br>(29.81-72.81) | 11.49 (9.46-13.90)     | 49.25<br>(39.27-59.29) | 45.87<br>(36.08-55.99) | 34.45 (22.37-48.94) |
| <b>Wealth quintile</b>          |                        |                        |                        |                        |                        |                        |                        |                     |
| Poorest                         | 6.34<br>(4.98-8.05)    | 34.87<br>(24.54-46.85) | 34.41<br>(24.11-46.43) | 37.73<br>(22.81-55.41) | 4.90 (3.51-6.80)       | 21.27<br>(10.47-38.43) | 21.27<br>(10.47-38.43) | 83.31 (43.92-96.95) |
| Poorer                          | 5.68<br>(4.46-7.21)    | 29.49<br>(19.54-41.85) | 27.52<br>(18.00-39.65) | 35.87<br>(18.54-57.90) | 6.33 (4.81-8.29)       | 16.69<br>(8.76-29.48)  | 13.56 (6.55-25.97)     | 26.04 (6.89-62.63)  |
| Middle                          | 7.74<br>(6.30-9.49)    | 35.74<br>(25.36-47.66) | 30.32<br>(20.79-41.91) | 31.38<br>(16.96-50.58) | 8.21 (6.55-10.26)      | 37.62<br>(27.08-49.48) | 32.68<br>(22.77-44.43) | 47.21 (28.64-66.59) |
| Richer                          | 11.29<br>(9.54-13.32)  | 35.21<br>(27.05-44.66) | 32.85<br>(24.80-42.06) | 28.54<br>(17.57-42.81) | 11.62 (9.63-13.96)     | 38.93<br>(29.08-49.78) | 35.16<br>(26.18-45.35) | 23.81 (12.45-40.73) |
| Richest                         | 16.28<br>(14.15-18.65) | 49.84<br>(43.01-56.67) | 45.48<br>(39.04-52.07) | 26.16<br>(18.49-35.63) | 21.08<br>(18.57-23.84) | 45.27<br>(37.14-53.66) | 40.85<br>(32.93-49.27) | 26.84 (17.89-38.19) |
| <b>Nutritional status (BMI)</b> |                        |                        |                        |                        |                        |                        |                        |                     |
| Underweight                     | 6.15<br>(4.59-8.18)    | 16.03<br>(8.52-28.13)  | 16.03<br>(8.52-28.13)  | 41.10<br>(16.54-71.07) | 6.27 (4.72-8.29)       | 22.17<br>(12.39-36.47) | 22.17<br>(12.39-36.47) | 69.71 (36.02-90.39) |
| Normal                          | 7.18<br>(6.15-8.37)    | 43.76<br>(36.33-51.47) | 40.97<br>(33.64-48.73) | 34.84<br>(24.38-47.00) | 8.65 (7.43-10.06)      | 30.15<br>(23.52-37.73) | 26.02<br>(19.95-33.16) | 30.69 (19.28-45.08) |
| Overweight                      | 8.97<br>(7.29-11.01)   | 41.30<br>(31.16-52.22) | 37.60<br>(27.73-48.62) | 27.48<br>(17.35-33.35) | 13.09<br>(10.74-15.85) | 43.01<br>(32.99-53.64) | 38.76<br>(29.14-49.35) | 29.40 (16.21-47.27) |
| Obese                           | 14.48<br>(12.78-16.35) | 42.12<br>(35.86-48.65) | 37.81<br>(31.78-44.25) | 24.48<br>(17.35-35.54) | 18.00<br>(15.42-20.89) | 47.29<br>(38.41-56.34) | 43.56<br>(34.78-52.76) | 28.38 (17.95-41.78) |
| <b>Currently working status</b> |                        |                        |                        |                        |                        |                        |                        |                     |
| No                              | 11.56<br>(10.35-12.88) | 39.02<br>(33.91-44.38) | 36.36<br>(31.43-41.60) | 28.06 (21.98-35.07)    | 13.36<br>(10.87-16.31) | 42.74<br>(32.64-53.48) | 37.97<br>(28.74-48.15) | 35.16 (21.80-51.35) |
| Yes                             | 6.73<br>(5.85-7.74)    | 41.32<br>(34.22-48.80) | 36.63<br>(29.80-44.03) | 33.45 (22.93-35.07)    | 10.03 (9.05-11.10)     | 35.80<br>(30.36-41.65) | 32.20<br>(27.00-37.89) | 31.74 (24.14-40.45) |
| <b>Hypertension</b>             |                        |                        |                        |                        |                        |                        |                        |                     |
| No                              | 6.78<br>(5.98-7.68)    | 26.32<br>(21.45-31.84) | 22.94<br>(18.29-28.35) | 29.53 (19.87-41.47)    | 8.20 (7.20-9.34)       | 26.29<br>(20.71-32.75) | 23.80<br>(18.52-30.03) | 38.73 (27.53-51.25) |
| Yes                             | 16.31<br>(14.43-18.38) | 53.65<br>(47.80-59.40) | 50.49<br>(44.64-56.33) | 29.77 (23.42-37.02)    | 16.97<br>(14.87-19.30) | 51.66<br>(43.77-59.46) | 46.05<br>(38.30-53.89) | 28.13 (19.59-38.62) |

167 Fig 2 and 3 depict the awareness of diabetes and the status of its treatment for both men and women, respectively.  
168 Separate pie charts are employed to illustrate the awareness and treatment status of diabetes for each of the eight  
169 divisions. Four categories are displayed in the pie charts: "Aware, not treated," "Aware, treated, and controlled,"  
170 "Aware, treated, and not controlled," and "Unaware". Each division's sample population is shown by a pie chart  
171 whose size corresponds to its overall size. Fig 2 and 3 illustrates that, among all the divisions, Dhaka and Chittagong  
172 have the biggest sample sizes for both men and women.

173 **Fig 2: Pie chart of diabetes awareness, treatment status by division for men in Bangladesh.**

174 **Fig 3: Pie chart of diabetes awareness, treatment status by division for women in Bangladesh.**

175 Diabetes hotspot maps were produced using the Local Moran's I along with univariate local indicator of spatial  
176 association (LISA) clustering methods to investigate the spatial dependence and clustering of diabetes in  
177 Bangladesh. The calculated Moran's I value (0.215,  $p = 0.001$ ) suggests that there is positive spatial autocorrelation,  
178 which suggests that values that are similar, whether high or low, are clustered. The univariate LISA cluster map (Fig  
179 4) and LISA significance map (Fig 5) showed that Dhaka, Gazipur, Comilla, Chandpur, Narayanganj, and other  
180 locations were home to all of the hotspots. Panchagarh, Rangpur, Dinajpur, Feni, Lalmonirhat, and some other  
181 districts were where the cold spots were identified. The statistical significance level at which each region can be  
182 considered to have meaningfully contributed to the findings of the global spatial autocorrelation is shown by the  
183 LISA significance map.

184 **Fig 4: LISA cluster map of diabetes hotspots and cold spots by division.**

185 **Fig 5: LISA significance map of diabetes hotspots and cold spots by division.**

## 186 Discussion

187 The study specifically aims to investigate the spatial distribution of diabetes prevalence across 64 districts in  
188 Bangladesh using data from a nationally representative sample survey (BDHS 17-18). In this study, the relationship  
189 between age, sex, nutritional status, residency, level of education, employment status, socio-economic status, and  
190 hypertension is also examined in relation to diabetes prevalence. According to the findings, those who are older,  
191 more educated, in better socioeconomic standing, have higher BMIs, and residing in urban areas have a much

192 greater chance of developing diabetes than those who do not meet those criteria. The research's conclusions are in  
193 line with the results of numerous other studies carried out in comparable circumstances[23,24].

194 Our study shows that 9.50% of women and 10.52% of men have diabetes. In other Asian nations, comparable  
195 figures have been noted: China (women: 8.8%, men: 10.6%)[25], Nepal (women: 10.0%, men: 15.3%)[26], Korea  
196 (women: 7.5%, men: 8.1%)[27], Pakistan (women: 15.8%, men: 14.8%)[28]. Additionally, the findings demonstrate  
197 that in terms of men and women, residents of urban regions had significantly higher diabetes prevalence rates than  
198 those in rural areas[29]. Like Bangladesh, other countries on the Indian subcontinent, such as India, Bhutan, Nepal,  
199 and Sri Lanka, have a higher prevalence of diabetes in urban areas[30].

200 Diabetes, and BMI, and older age are also related. Men and women who are older in age have a higher  
201 prevalence of diabetes than those who are younger. This has also been noticed on other studies done in  
202 Bangladesh[31,32], China[25,33], India[34]. This reflects the characteristics of diabetes, a chronic illness that  
203 typically manifests in later life[7]. Furthermore, overweight and obese individuals are more susceptible to diabetes  
204 than others. The results of additional research that has been undertaken also support these findings[35,36]. Higher  
205 socioeconomic class, as indicated by the wealth quintile and education level, was associated with a higher  
206 prevalence of diabetes. Many other research conducted in developing nations identified that socioeconomic status  
207 raised the likelihood of obesity and diabetes[37–39]. Moreover, people tend to live more sedentary lifestyles and  
208 consume more calorie-dense diets, which may increase their chance of developing diabetes along with other chronic  
209 illnesses[7,40]. Our findings show that the prevalence of diabetes is higher in unemployed people than the employed  
210 individuals. In our study, individuals with hypertension had a higher possibility of developing diabetes than those  
211 without. This has been observed in other studies as well[25,39,41,42].

212 39.71% of women and 37.11 % of men are aware of their condition, according to the findings. Among them,  
213 36.44% females and 33.29% males are taking medication for diabetes. And of those taking medication, only 29.70%  
214 of women and 32.40% of men have their diabetes under control. 37.11% of men and 39.71% of women in  
215 Bangladesh are aware that they have diabetes, which is lower than awareness in Nepal (men: 68%, women:  
216 62%)[26], China (men: 38%, women: 41%)[43]. These findings suggest that diabetes management in Bangladesh is  
217 worse than in other countries of South and East Asia[44]. Moreover, our study indicates that women have a greater

218 likelihood to be aware of, take medication for, and control their diabetes than men. This is also found in other  
219 studies done in Bangladesh[45,46], Nepal[26] and China[47].

220 This study revealed that awareness and treatment increases with age, which is consistent with findings from  
221 earlier research carried out in LMICs in Asia, including Bangladesh, Nepal, and China[26,45,47]. Our findings also  
222 point to relatively low rates of diabetes awareness, treatment, and control among young individuals, both for men  
223 and women.

224 According to our study, people in the two quintiles of highest wealth are more likely to be aware of being  
225 diabetic and receive medical treatment for it than people in other quintiles. Findings from additional studies  
226 conducted in Bangladesh give support to this[46].

227 Additionally, a more detailed geographic description of diabetes hotspots and diabetes cold spots in Bangladesh  
228 were defined. Hotspots and cold spots were mapped according to the prevalence of diabetes within the sample  
229 population using Moran's I[20]. Moran's I is a popular geographical statistic for identifying global spatial  
230 trends[48]. It evaluates how closely related one object is to those around it. An approach to checking for  
231 autocorrelation in data is the Moran's I test. Spatial autocorrelation denotes the presence of systematic spatial  
232 variation in a mapped variable[49]. Geographically close values of a variable on a map have a tendency to be similar  
233 when there is positive spatial autocorrelation: high values tend to exist in proximity to other high values; medium  
234 values are generally located closer to medium values; and low values are generally found nearby other low  
235 values[50]. As a result, a clustering of similar values in terms of diabetes prevalence can be seen across districts in  
236 Bangladesh.

237 LISA provides a measure of how much the distribution of values surrounding a specific location differs from spatial  
238 randomization [51]. The LISA significance map displays the areas with significant local Moran statistics, and the  
239 LISA cluster map classifies these locations according to the type of association[19]. The presence of spatial clusters  
240 (high values surrounded by similar high values and low values surrounded by similar low values) and spatial outliers  
241 (high values surrounded by low values along with low values surrounded by high values) are illustrated on the LISA  
242 cluster map[19]. Cold spots denote regions with low level of diabetes prevalence that are also surrounded by regions  
243 with low level of diabetes prevalence, while hot spots denote regions with high level of diabetes prevalence that are  
244 surrounded by other regions with high level of diabetes prevalence. The statistical level at which any region can be

245 considered to be significantly contributing to the findings of the global spatial autocorrelation is illustrated on the  
246 LISA significance map[21]. We can identify which areas are contributing most significantly to the overall result and  
247 in which direction by utilizing the LISA cluster map and the LISA significance map.

248 This analysis has several limitations that should be stated. In addition to the factors that our analysis identified to  
249 be linked to diabetes, there are a number of other factors. Diabetes is linked to dietary patterns, smoking behaviors,  
250 alcohol use, physical activity levels, insulin resistance, and more[52–56]. Information about these factors is absent  
251 from the dataset. Because this study is cross-sectional, it can only give a partial picture of spatial accessibility over a  
252 specific period of time and may also be vulnerable to problems with residential self-selection. Despite the fact that  
253 there are many different indicators of global and local spatial association, only the global and local Moran's I  
254 statistic was utilized in our investigation[57]. This is another limitation of our study.

255 The study's advantages include the use of a sizable, nationally representative dataset, which suggests the  
256 conclusions are reliable. The application of precise techniques for determining clinical parameters like blood  
257 pressure, weight, height, and fasting blood glucose is another advantage of this study. Diabetes was categorized  
258 according to WHO standards. With the use of geographical analysis, we were able to research and examine the  
259 regional differences in diabetes in Bangladesh.

## 260 **Conclusion**

261 This study raises concerns about the need to better comprehend the major and predictable effects that geography  
262 has on population health. According to this study, initiatives in Bangladesh to increase public awareness of and  
263 control of diabetes need to be reinforced and optimized, with additional funding. This might necessitate alterations  
264 to the health care system, including a focus on non-communicable disease prevention and a reassessment of medical  
265 care payments to cut down on out-of-pocket costs. Our data further suggests that efforts to prevent diabetes should  
266 center on lowering obesity and controlling hypertension. There is a requirement for improved preventative strategies  
267 in addition to better management of obesity and hypertension. Diabetes will continue to escalate in Bangladesh if  
268 appropriate prevention measures are not taken.

269 Furthermore, the prevalence of diabetes with regard to geographic clusters can be examined using spatial  
270 analysis. Additionally, hot spot analysis will enable public health professionals to implement suitable strategies and

271 initiatives in light of specific geographical regions. As regions encompasses more than just a place's physical  
272 features; it also refers to the cultures, institutions, customs, and way of life that its inhabitants are regularly exposed  
273 to[58]. The LISA cluster and significance maps can also be useful in detecting diabetes risk factors in various  
274 geographic locations, which might further boost the preventive and control measures of diabetes with reference to  
275 various associated factors.

## 276 **Acknowledgement**

277 The authors thank MEASURE DHS for allowing permission for using the BDHS 17-18 dataset.

## 278 **Reference**

- 279 1. Caldwell J, Caldwell P. What have we learnt about the cultural, social and behavioural determinants of  
280 health? From Selected Readings to the first Health Transition Workshop. *Health Transit Rev.* 1991;1(1):3–  
281 19.
- 282 2. Omran AR. eweb:279147. 2005 [cited 2022 Dec 5]. The Epidemiologic Transition: A Theory of the  
283 Epidemiology of Population Change. Available from:  
284 <https://repository.library.georgetown.edu/handle/10822/985755>
- 285 3. Kahn SE, Hull RL, Utzschneider KM. Mechanisms linking obesity to insulin resistance and type 2 diabetes.  
286 *Nature.* 2006 Dec;444(7121):840–6.
- 287 4. Scobie IN, Samaras K. *Fast Facts: Diabetes Mellitus.* Karger Medical and Scientific Publishers; 2014. 138  
288 p.
- 289 5. Chatterjee S, Khunti K, Davies MJ. Type 2 diabetes. *The Lancet.* 2017 Jun 3;389(10085):2239–51.
- 290 6. WHO. Diabetes [Internet]. [cited 2022 Dec 5]. Available from: [https://www.who.int/news-room/fact-](https://www.who.int/news-room/fact-sheets/detail/diabetes)  
291 [sheets/detail/diabetes](https://www.who.int/news-room/fact-sheets/detail/diabetes)
- 292 7. IDF. *IDF Diabetes Atlas 2021 | IDF Diabetes Atlas [Internet].* 2021 [cited 2022 Nov 28]. Available from:  
293 <https://diabetesatlas.org/atlas/tenth-edition/>

- 294 8. Morland K, Diez Roux AV, Wing S. Supermarkets, Other Food Stores, and Obesity: The Atherosclerosis  
295 Risk in Communities Study. *Am J Prev Med.* 2006 Apr 1;30(4):333–9.
- 296 9. Swinburn BA, Sacks G, Hall KD, McPherson K, Finegood DT, Moodie ML, et al. The global obesity  
297 pandemic: shaped by global drivers and local environments. *The Lancet.* 2011 Aug 27;378(9793):804–14.
- 298 10. Mesev V. *Remotely-Sensed Cities.* CRC Press; 2003. 416 p.
- 299 11. Grubestic TH, Miller JA, Murray AT. Geospatial and geodemographic insights for diabetes in the United  
300 States. *Appl Geogr.* 2014 Dec 1;55:117–26.
- 301 12. Harris R, Sleight P, Webber R. *Geodemographics, GIS and Neighbourhood Targeting.* John Wiley and  
302 Sons; 2005. 368 p.
- 303 13. Twigg L, Moon G, Jones K. Predicting small-area health-related behaviour: a comparison of smoking and  
304 drinking indicators. *Soc Sci Med.* 2000 Apr 1;50(7):1109–20.
- 305 14. Abbas J, Ojo A, Orange S. Geodemographics – a tool for health intelligence? *Public Health.* 2009 Jan  
306 1;123(1):e35–9.
- 307 15. Barquera S, Tovar-Guzmán V, Campos-Nonato I, González-Villalpando C, Rivera-Dommarco J.  
308 Geography of diabetes mellitus mortality in Mexico: an epidemiologic transition analysis. *Arch Med Res.*  
309 2003 Sep 1;34(5):407–14.
- 310 16. Green C, Hoppa RD, Young TK, Blanchard JF. Geographic analysis of diabetes prevalence in an urban  
311 area. *Soc Sci Med.* 2003 Aug 1;57(3):551–60.
- 312 17. Niport NI of PR and T, Welfare M of H and F, ICF. Bangladesh Demographic and Health Survey 2017-18.  
313 2020 Oct 1 [cited 2022 Nov 6]; Available from: [https://dhsprogram.com/publications/publication-FR344-](https://dhsprogram.com/publications/publication-FR344-DHS-Final-Reports.cfm)  
314 [DHS-Final-Reports.cfm](https://dhsprogram.com/publications/publication-FR344-DHS-Final-Reports.cfm)
- 315 18. WHO Expert Consultation. Appropriate body-mass index for Asian populations and its implications for  
316 policy and intervention strategies. *Lancet Lond Engl.* 2004 Jan 10;363(9403):157–63.



- 317 19. Anselin L, Syabri I, Kho Y. GeoDa: An Introduction to Spatial Data Analysis. In: Fischer MM, Getis A,  
318 editors. Handbook of Applied Spatial Analysis: Software Tools, Methods and Applications [Internet].  
319 Berlin, Heidelberg: Springer; 2010 [cited 2022 Nov 28]. p. 73–89. Available from:  
320 [https://doi.org/10.1007/978-3-642-03647-7\\_5](https://doi.org/10.1007/978-3-642-03647-7_5)
- 321 20. Moran PAP. Notes on Continuous Stochastic Phenomena. *Biometrika*. 1950;37(1/2):17–23.
- 322 21. Anselin L. Local Indicators of Spatial Association—LISA. *Geogr Anal*. 1995;27(2):93–115.
- 323 22. Anselin L. Exploring Spatial Data with GeoDa™: A Workbook. 2004.
- 324 23. Saquib N, Saquib J, Ahmed T, Khanam MA, Cullen MR. Cardiovascular diseases and Type 2 Diabetes in  
325 Bangladesh: A systematic review and meta-analysis of studies between 1995 and 2010. *BMC Public*  
326 *Health*. 2012 Jun 13;12(1):434.
- 327 24. Akter S, Rahman MM, Abe SK, Sultana P. Prevalence of diabetes and prediabetes and their risk factors  
328 among Bangladeshi adults: a nationwide survey. *Bull World Health Organ*. 2014 Mar 1;92(3):204-213A.
- 329 25. Yang W, Lu J, Weng J, Jia W, Ji L, Xiao J, et al. Prevalence of Diabetes among Men and Women in China.  
330 *N Engl J Med*. 2010 Mar 25;362(12):1090–101.
- 331 26. Gyawali B, Hansen MRH, Povlsen MB, Neupane D, Andersen PK, McLachlan CS, et al. Awareness,  
332 prevalence, treatment, and control of type 2 diabetes in a semi-urban area of Nepal: Findings from a cross-  
333 sectional study conducted as a part of COBIN-D trial. *PLOS ONE*. 2018 Nov 2;13(11):e0206491.
- 334 27. Kim SM, Lee JS, Lee J, Na JK, Han JH, Yoon DK, et al. Prevalence of Diabetes and Impaired Fasting  
335 Glucose in Korea: Korean National Health and Nutrition Survey 2001. *Diabetes Care*. 2006 Feb  
336 1;29(2):226–31.
- 337 28. Akhtar S, Nasir JA, Abbas T, Sarwar A. Diabetes in Pakistan: A systematic review and meta-analysis. *Pak*  
338 *J Med Sci*. 2019;35(4):1173–8.
- 339 29. Kibria GMA, Swasey K, Gupta RD, Choudhury A, Nayeem J, Sharmeen A, et al. Differences in prevalence  
340 and determinants of hypertension according to rural–urban place of residence among adults in Bangladesh.  
341 *J Biosoc Sci*. 2019 Jul;51(4):578–90.

- 342 30. Wild S, Roglic G, Green A, Sicree R, King H. Global Prevalence of Diabetes: Estimates for the year 2000  
343 and projections for 2030. *Diabetes Care*. 2004 May 1;27(5):1047–53.
- 344 31. Sayeed MA, Ali L, Hussain MZ, Rumi MA, Banu A, Azad Khan AK. Effect of Socioeconomic Risk  
345 Factors on the Difference in Prevalence of Diabetes Between Rural and Urban Populations in Bangladesh.  
346 *Diabetes Care*. 1997 Apr 1;20(4):551–5.
- 347 32. Abdul Baker Chowdhury M, Uddin MJ, Khan H, Haque MR. Type 2 diabetes and its correlates among  
348 adults in Bangladesh: a population based stud. *Dep Biostat Fac Publ [Internet]*. 2015 Oct 19; Available  
349 from: [https://digitalcommons.fiu.edu/biostatistics\\_fac/2](https://digitalcommons.fiu.edu/biostatistics_fac/2)
- 350 33. Pan XR, Yang W, Li GW. Prevalence of Diabetes and Its Risk Factors in China, 1994 | *Diabetes Care* |  
351 American Diabetes Association [Internet]. [cited 2022 Nov 30]. Available from:  
352 <https://diabetesjournals.org/care/article/20/11/1664/21163/Prevalence-of-Diabetes-and-Its-Risk-Factors-in>
- 353 34. Ramachandran A, Snehalatha C, Kapur A, Vijay V, Mohan V, Das AK, et al. High prevalence of diabetes  
354 and impaired glucose tolerance in India: National Urban Diabetes Survey. *Diabetologia*. 2001 Sep  
355 1;44(9):1094–101.
- 356 35. Abarca-Gómez L, Abdeen ZA, Hamid ZA, Abu-Rmeileh NM, Acosta-Cazares B, Acuin C, et al.  
357 Worldwide trends in body-mass index, underweight, overweight, and obesity from 1975 to 2016: a pooled  
358 analysis of 2416 population-based measurement studies in 128·9 million children, adolescents, and adults.  
359 *The Lancet*. 2017 Dec 16;390(10113):2627–42.
- 360 36. Chowdhury MAB, Adnan MM, Hassan MZ. Trends, prevalence and risk factors of overweight and obesity  
361 among women of reproductive age in Bangladesh: a pooled analysis of five national cross-sectional  
362 surveys. *BMJ Open*. 2018 Jul 1;8(7):e018468.
- 363 37. Jebb SA, Moore MS. Contribution of a sedentary lifestyle and inactivity to the etiology of overweight and  
364 obesity: current evidence and research issues. *Med Sci Sports Exerc*. 1999 Nov 1;31(11 Suppl):S534-41.
- 365 38. Misra A, Khurana L. Obesity and the Metabolic Syndrome in Developing Countries. *J Clin Endocrinol*  
366 *Metab*. 2008 Nov 1;93(11\_supplement\_1):s9–30.

- 367 39. Ahasan HN, Islam MZ, Alam MB, Miah MT, Nur Z, Mohammed FR, et al. Prevalence and Risk Factors of  
368 Type 2 Diabetes Mellitus Among Secretariat Employees of Bangladesh. *J Med*. 2011;12(2):125–30.
- 369 40. Ahmed SM, Hadi A, Razzaque A, Ashraf A, Juvekar S, Ng N, et al. Clustering of chronic non-  
370 communicable disease risk factors among selected Asian populations: levels and determinants. *Glob Health*  
371 *Action*. 2009 Nov 1;2(s4):1986.
- 372 41. Rahim MA, Hussain A, Azad Khan AK, Sayeed MA, Keramat Ali SM, Vaaler S. Rising prevalence of type  
373 2 diabetes in rural Bangladesh: A population based study. *Diabetes Res Clin Pract*. 2007 Aug 1;77(2):300–  
374 5.
- 375 42. Bhowmik B, Afsana F, Diep LM, Munir SB, Wright E, Mahmood S, et al. Increasing Prevalence of Type 2  
376 Diabetes in a Rural Bangladeshi Population: A Population Based Study for 10 Years. *Diabetes Metab J*.  
377 2013 Feb 18;37(1):46–53.
- 378 43. Li M zhi, Su L, Liang B yun, Tan J jing, Chen Q, Long J xiong, et al. Trends in Prevalence, Awareness,  
379 Treatment, and Control of Diabetes Mellitus in Mainland China from 1979 to 2012. *Int J Endocrinol*. 2013  
380 Oct 28;2013:e753150.
- 381 44. Islam A, Biswas T. Health System in Bangladesh: Challenges and Opportunities. *Am J Health*. 2014;
- 382 45. Rahman MS, Akter S, Abe SK, Islam MR, Mondal MNI, Rahman JAMS, et al. Awareness, Treatment, and  
383 Control of Diabetes in Bangladesh: A Nationwide Population-Based Study. *PLOS ONE*. 2015 Feb  
384 18;10(2):e0118365.
- 385 46. Khan N, Oldroyd JC, Hossain MB, Islam RM. Awareness, Treatment, and Control of Diabetes in  
386 Bangladesh: Evidence from the Bangladesh Demographic and Health Survey 2017/18. Seixas A, editor. *Int*  
387 *J Clin Pract*. 2022 Apr 22;2022:1–9.
- 388 47. Wang Q, Zhang X, Fang L, Guan Q, Guan L, Li Q. Prevalence, awareness, treatment and control of  
389 diabetes mellitus among middle-aged and elderly people in a rural Chinese population: A cross-sectional  
390 study. *PLOS ONE*. 2018 Jun 1;13(6):e0198343.

- 391 48. Jackson MC, Huang L, Xie Q, Tiwari RC. A modified version of Moran's I. *Int J Health Geogr*. 2010 Jun  
392 29;9(1):33.
- 393 49. Haining RP. Spatial Autocorrelation. In: Smelser NJ, Baltes PB, editors. *International Encyclopedia of the*  
394 *Social & Behavioral Sciences* [Internet]. Oxford: Pergamon; 2001 [cited 2022 Dec 4]. p. 14763–8.  
395 Available from: <https://www.sciencedirect.com/science/article/pii/B0080430767025110>
- 396 50. Li L, Jiang Z, Duan N, Dong W, Hu K, Sun W. Chapter 8 - An Approach to Optimize Police Patrol  
397 Activities Based on the Spatial Pattern of Crime Hotspots11This chapter is adapted from Li, L., Jiang, Z.,  
398 Duan, N., Dong, W., & Sun, W., Police patrol service optimization based on the spatial pattern of hotspots,  
399 in 2011 IEEE International Conference on Service Operations and Logistics, and Informatics. In: Xiong G,  
400 Liu Z, Liu XW, Zhu F, Shen D, editors. *Service Science, Management, and Engineering*: [Internet].  
401 Boston: Academic Press; 2012 [cited 2022 Dec 4]. p. 141–63. Available from:  
402 <https://www.sciencedirect.com/science/article/pii/B9780123970374000089>
- 403 51. Anselin L, Cohen J, Cook D, Gorr W, Tita G. *Spatial Analyses of Crime*. *Crim JUSTICE*. 2000;51.
- 404 52. Wiki J, Kingham S, Campbell M. A geospatial analysis of Type 2 Diabetes Mellitus and the food  
405 environment in urban New Zealand. *Soc Sci Med*. 2021 Nov 1;288:113231.
- 406 53. Will JC, Galuska DA, Ford ES, Mokdad A, Calle EE. Cigarette smoking and diabetes mellitus: evidence of  
407 a positive association from a large prospective cohort study. *Int J Epidemiol*. 2001 Jun 1;30(3):540–6.
- 408 54. Howard AA, Arnsten JH, Gourevitch MN. Effect of Alcohol Consumption on Diabetes Mellitus. *Ann*  
409 *Intern Med*. 2004 Feb 3;140(3):211–9.
- 410 55. Plotnikoff RC, Lippke S, Courneya K, Birkett N, Sigal R. Physical activity and diabetes: An application of  
411 the theory of planned behaviour to explain physical activity for Type 1 and Type 2 diabetes in an adult  
412 population sample. *Psychol Health*. 2010 Jan 1;25(1):7–23.
- 413 56. Seidell JC. Obesity, insulin resistance and diabetes — a worldwide epidemic. *Br J Nutr*. 2000  
414 Jun;83(S1):S5–8.

- 415 57. Bivand RS, Wong DWS. Comparing implementations of global and local indicators of spatial association.  
416 TEST. 2018 Sep 1;27(3):716–48.
- 417 58. Cresswell T. Place: An Introduction. John Wiley & Sons; 2014. 242 p.

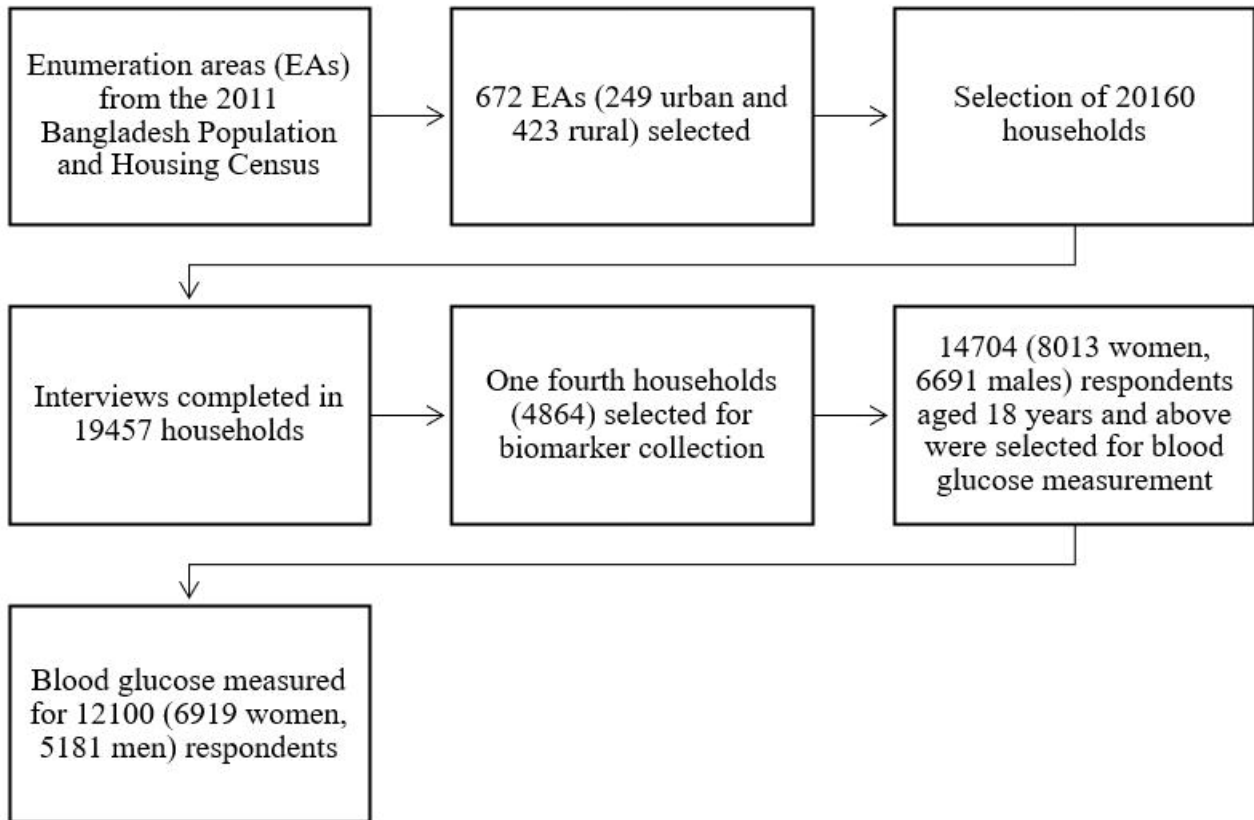

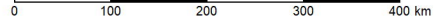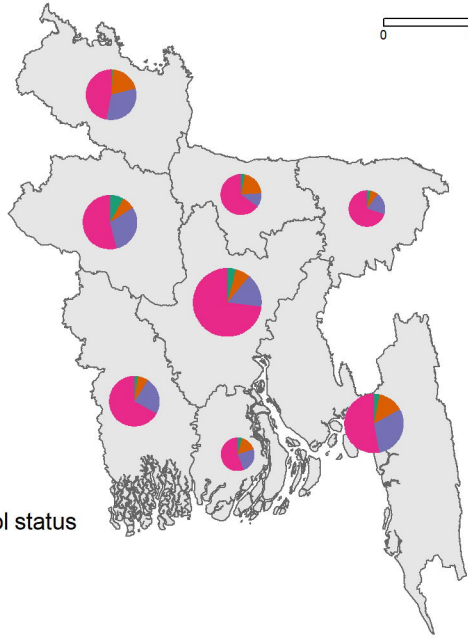

### Population Size

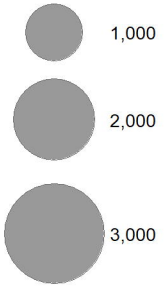

### Awareness, treatment and control status

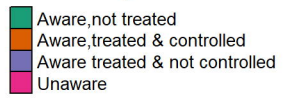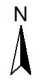

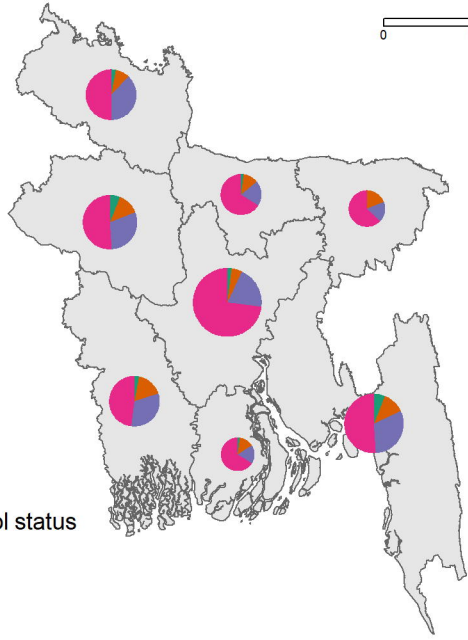

### Population Size



### Awareness, treatment and control status





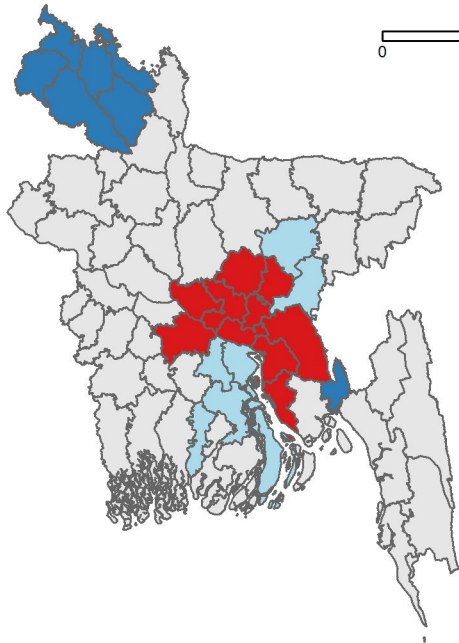

0 100 200 300 400 km

### Diabetes hotspot

- High-High
- Low-High
- Low-Low
- Not Significant

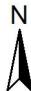

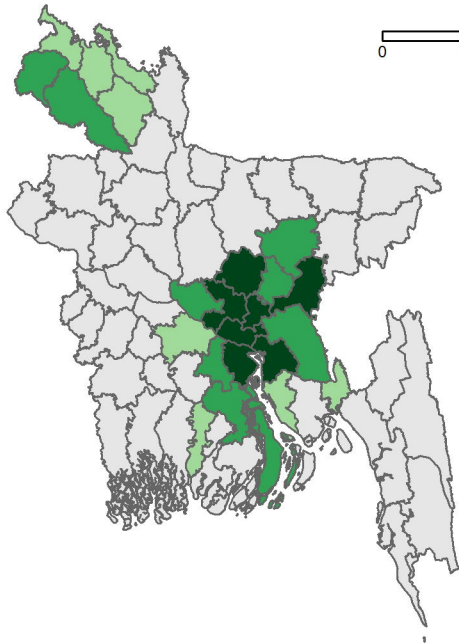

0 100 200 300 400 km

### Significance

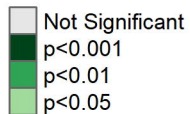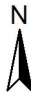

Source: https://medrxiv.org/content/10.1101/2024.06.10.24308733.full.pdf
